# Supplementary material
Source: HighWire-hosted journal article supplement (https://www.g3journal.org/content/suppl/2013/03/07/g3.113.005553)
Supplement: TableS2.pdf [file TableS2.pdf]

**Table S2 Independent data sets to evaluate first results for recombination between SNP pairs.**

|                     |               | MALE         |              | FEMALE       |              |
|---------------------|---------------|--------------|--------------|--------------|--------------|
| SNP PAIR APROXIMATE |               |              |              |              |              |
| CHR.                | POSITIONS     | 1ST DATA SET | 2ND DATA SET | 1ST DATA SET | 2ND DATA SET |
| 8                   | 9.5 and 24Mbp | 0.167        | 0.333        | 0.037        | 1.000        |
| 9                   | 98 and 112Mbp | 0.130        | 0.648        | 0.765        | 1.000        |
| 13                  | 99 and 113Mbp | 1.000        | 0.801        | 0.144        | 0.498        |
| 16                  | 23 and 38Mbp  | 0.719        | 0.489        | 0.077        | 0.592        |
| 16                  | 38 and 68Mbp  | 0.367        | 0.844        | 1.000        | 1.000        |
| 16                  | 68 and 86Mbp  | 0.328        | 0.281        | 0.047        | 0.747        |
| 17                  | 68 and 86Mbp  | < 0.0001     | 0.726        | 1.000        | 0.541        |
| 19                  | 9 and 23Mbp   | 0.859        | 0.446        | 0.024        | 1.000        |
| 19                  | 23 and 53Mbp  | 1.000        | 0.331        | 0.008        | 1.000        |

Statistical  $p$  values of the comparison between analysis groups MWT vs. MKO and FWT vs. FKO for 6 SNP pairs chosen randomly, for 2 SNP pairs (chromosome 19 for FWT vs. FKO analysis) for which in the first analysis the statistical difference was relatively high but not significant and 1SNP pair in chromosome 17 (for MWT vs. MKO analysis) for which the statistical analysis indicated a significant difference (1<sup>st</sup> data set) and for an independent and larger set of samples from the same matings (2<sup>nd</sup> data set).
